# Supplementary material for: Unraveling the association of physiological traits controlling grain yield under moisture stress and diversity analysis in durum wheat germplasam using Principal component analysis
Source: Research Square preprint supplement (doi:10.21203/rs.3.rs-7299242/v1), 2026-02-11
Supplement: Supplementary file 1 [file 2be45395b203c6cce9287739.docx]

**Fig. S1. Scree Plot Showing Variance Explained by Principal Components Under Moisture Stress for Morphophysiological and yield traits**


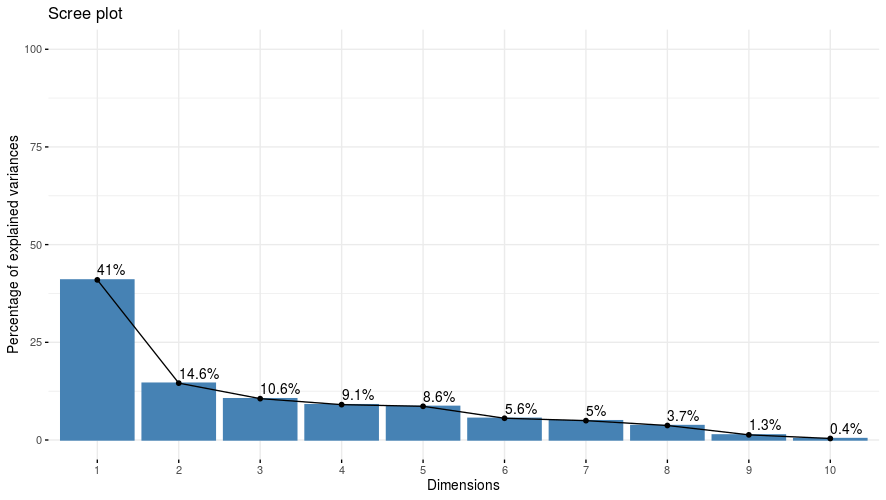


**
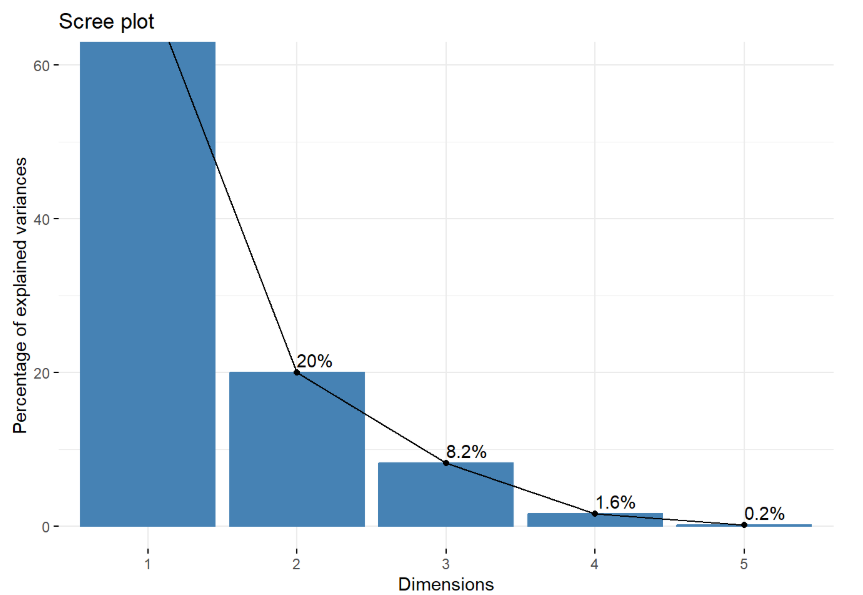
Fig. S2. Scree Plot Showing Variance Explained by Principal Components Under Moisture Stress for seedling traits**

**Table S1: ANOVA for augmented design for different morpho-physiological traits under both stress and non-stress conditions.**

|  | **Source** | **Block**  **(eliminating treatments)** | **Treatment (ignoring Blocks)** | **Checks** | **Geno**ty**pes** | **Checks v/s Genotypes** | **Error** |
| --- | --- | --- | --- | --- | --- | --- | --- |
| df | 7 | 224 | 4 | 219 | 1 | 28 |
| Plant height | Non-stress | 3.66 | 87.6** | 296.8** | 83.88** | 64.75* | 9.55 |
| Stress | 1.42 | 85.89** | 496.14** | 78.43** | 78.24** | 0.74 |
| Days to 50% flowering | Non-stress | 39.57 | 155.48** | 38.21 | 152.09** | 1365.74** | 32.04 |
| Stress | 16.33 | 132.75** | 110.35** | 128.84** | 1078.72** | 10.29 |
| SPAD I | Non-stress | 33.44* | 23.8* | 156.68** | 21.13* | 76.85* | 11.74 |
| Stress | 6.23 | 26.92** | 32** | 26.67** | 61.11** | 3.92 |
| SPAD II | Non-stress | 47.77 | 27.7 | 35.36 | 27.65 | 9.29 | 26.49 |
| Stress | 6.84 | 32.42** | 25.63** | 32.53** | 35.53* | 5.01 |
| Canopy temperature I | Non-stress | 13.33* | 6.41** | 2.89 | 6.48** | 6.06 | 2.85 |
| Stress | 3.86 | 3.28* | 3.45 | 3.28* | 2.36 | 1.75 |
| Canopy temperature II | Non-stress | 8.79* | 3.19** | 1.41 | 3.24** | 0.61 | 1.01 |
| Stress | 6.63 | 5.17** | 6.78** | 5.16** | 0.83 | 0.94 |
| Membrane stability | Non-stress | 165.13* | 62.71** | 50.14 | 62.99** | 51.47 | 23.16 |
| Stress | 17.88 | 355** | 258.03** | 352.67** | 1253.5** | 8.9 |
| Spike length | Non-stress | 0.99 | 1.54** | 3.77** | 1.44** | 14.92** | 0.59 |
| Stress | 0.43 | 1.27** | 5.06** | 1.16** | 10.33** | 0.41 |
| Number of Seeds per spike | Non-stress | 15.57 | 82.17** | 203.48** | 78.55** | 388.1** | 34.67 |
| Stress | 31.84 | 105.62** | 137.14** | 102.56** | 649.32** | 14.95 |
| Thousand grain weight | Non-stress | 13.11 | 38.12** | 159.23** | 36.05** | 7.3 | 9.43 |
| Stress | 20.59 | 40.78** | 104.37** | 39.78** | 4.85 | 11.82 |
| Grain yield | Non-stress | 0 | 0.03** | 0.11** | 0.02** | 0.03** | 0 |
|  | Stress | 0 | 0.01** | 0.11** | 0.01** | 0.02** | 0 |

* P <= 0.05; ** P <= 0.01

**Table S2: ANOVA for augmented design for different seedling traits under two moisture regimes**

|  | **Source** | **Block**  **(eliminating Treatments)** | **Treatment (ignoring Blocks)** | **Checks** | **Geno**ty**pes** | **Checks v/s Genotypes** | **Error** |
| --- | --- | --- | --- | --- | --- | --- | --- |
| df | 7 | 224 | 4 | 219 | 1 | 28 |
| Germination percentage | Non-stress | 34.29 | 158.89** | 108.75* | 149.76** | 566.43** | 31.61 |
| Stress | 156.79 | 714.35** | 2935.0** | 659.93** | 3697.05** | 87.59 |
| Coleoptile length | Non-stress | 0.12 | 0.51** | 1.38** | 0.49** | 0.10 | 0.08 |
| Stress | 1.35 | 5.09** | 10.0** | 4.96** | 14.63** | 0.63 |
| Root to shoot ratio | Non-stress | 0.01 | 0.01** | 0.03** | 0.01** | 0.00 | 0.0 |
| Stress | 0.02 | 0.13** | 0.13** | 0.13** | 0.00 | 0.03 |
| Seedling vigour I | Non-stress | 130816.47 | 452936.30* | 307911.14 | 443742.70* | 3046435.39** | 242901.81 |
| Stress | 159384.90 | 1088056.68** | 4682951.31** | 1025985.76** | 239936.92 | 69438.0 |
| Seedling vigour II | Non-stress | 111931.10 | 736541.02** | 834800.28** | 738108.98** | 120.73 | 95456.15 |
| Stress | 38510.10 | 1139690.5** | 5301519.6** | 1064778.0** | 823298.1** | 26701.74 |

* - P = < 0.05; ** P = < 0.01

**Table S3: Mean per cent reduction in the performance of various traits under moisture stress condition in durum wheat genotypes**

| **Traits** | **Percent reduction** |
| --- | --- |
| SPAD 2 | 6.977 |
| SPAD 1 | 2.949 |
| Canopy Temperature 1 (0C) | -10.1817 |
| Canopy Temperature 2 (0C) | -22.2579 |
| Membrane Stability (%) | 24.84302 |
| Plant Height (cm) | 4.806455 |
| Spike Length (cm) | 9.604196 |
| Number of Seeds per Spike | 8.661906 |
| 1000 Seed weight (g) | 3.607573 |
| Days to 50% Flowering | 4.6875 |
| Grain Yield (Kg/plot) | 26.84101 |
| Coleoptile length | 27.55 |
| Germination percentage | 46.97 |
| Seedling vigour I | 51.16 |
| Seedling vigour II | 57.30 |
| Root to shoot ratio | -50.22 |
